1 **Immunogenicity of Oxford-AstraZeneca COVID-19 vaccine in**  
2 **Vietnamese healthcare workers**

3 Nguyen Van Vinh Chau<sup>1</sup>, Lam Anh Nguyet<sup>2</sup>, Nguyen Thanh Truong<sup>1</sup>, Le Mau Toan<sup>1</sup>,  
4 Nguyen Thanh Dung<sup>1</sup>, Le Manh Hung<sup>1</sup>, Mai Thanh Nhan<sup>1</sup>, Dinh Nguyen Huy Man<sup>1</sup>,  
5 Nghiem My Ngoc<sup>1</sup>, Huynh Phuong Thao<sup>1</sup>, Tran Nguyen Hoang Tu<sup>1</sup>, Huynh Kim Mai<sup>3</sup>, Do  
6 Thai Hung<sup>3</sup>, Nguyen Thi Han Ny<sup>2</sup>, Le Kim Thanh<sup>2</sup>, Nguyen To Anh<sup>2</sup>, Nguyen Thi Thu  
7 Hong<sup>2</sup>, Le Nguyen Truc Nhu<sup>2</sup>, Lam Minh Yen<sup>2</sup>, Marc Choisy<sup>2,4</sup>, Tran Tan Thanh<sup>2</sup>, Guy  
8 Thwaites<sup>2,3</sup> and Le Van Tan<sup>2</sup>, for OUCRU COVID-19 Research Group\*

9 <sup>1</sup>Hospital for Tropical Diseases, Ho Chi Minh City, Vietnam

10 <sup>2</sup>Oxford University Clinical Research Unit, Ho Chi Minh City, Vietnam

11 <sup>3</sup>Institute of Pasteur, Nha Trang City, Vietnam

12 <sup>4</sup>Centre for Tropical Medicine and Global Health, Nuffield Department of Medicine,  
13 University of Oxford, Oxford, UK

\*Members of the groups are listed in the acknowledgments.

14 Correspondence: Nguyen Van Vinh Chau, [chaunvv@oucru.org](mailto:chaunvv@oucru.org), Le Van Tan,  
15 [tanlv@oucru.org](mailto:tanlv@oucru.org)

16 **Word count: abstract:** 49 **Main text:** 1465

17 **Running title:** Immunogenicity and safety of Oxford-AstraZeneca COVID-19 vaccine,  
18 Vietnam

19 **Keywords:** COVID-19, SARS-CoV-2, vaccine, pandemic, Vietnam

20 **ABSTRACT**

21 We studied the immunogenicity of Oxford-AstraZeneca COVID-19 vaccine in 554  
22 Vietnamese healthcare workers who were naïve to SARS-CoV-2 infection. Neutralizing  
23 antibodies increased after each dose. The sero-conversion rate reached 98.1% after dose 2.  
24 But at month 3, neutralizing antibodies decreased. The requirement for a third dose  
25 warrants further research.

26 Vaccination is critical to bring COVID-19 under control. Although a vaccine must fulfill  
27 the required efficacy criteria in order to receive an approval for use in humans, the rapid  
28 development and deployment of COVID-19 vaccines worldwide necessitate follow up  
29 studies to better understand the development and persistence of vaccine-induced immunity  
30 in different populations. Such knowledge is critical to inform the global vaccination  
31 strategies and the development of next-generation vaccines.

32 Vietnamese people remains relatively naïve to SARS-CoV-2 infections [1, 2]; as of 5<sup>th</sup> July  
33 2021, 19,579 PCR confirmed cases have been reported in a population of >97 million.  
34 Therefore Vietnam is an ideal setting for vaccine evaluation study as the results naturally  
35 reflect the immunity induced by COVID-19 vaccines. There has been no report about the  
36 immunogenicity of the Oxford-AstraZeneca COVID-19 vaccine from Southeast Asia. We  
37 studied the immunogenicity of Oxford-AstraZeneca COVID-19 vaccine in a cohort of 554  
38 healthcare workers of an infectious diseases hospital in southern Vietnam.

## 39 **METHODS**

### 40 **Setting**

41 The present study was conducted at the Hospital for Tropical Diseases (HTD) in HCMC.  
42 HTD is a 660-bed tertiary referral hospital for patients with infectious diseases (including  
43 COVID-19) in southern Vietnam [3]. According to the MOH criteria (Supplementary  
44 Materials), HTD members of staff were eligible for vaccination and were the first in  
45 Vietnam to receive a COVID-19 vaccine in March 2021.

### 46 **Data collection**

47 We collected demographics and 3ml of blood from the study participants. Blood sampling  
48 was scheduled for 7 time points, including before each dose, 14 days after each dose, and

49 month 1, 3, 6 and 12 after vaccination. After day 28 of the first dose, blood sampling was  
50 narrowed down to a subgroup of 144 individuals randomly selected from the study  
51 participants for subsequent follow up. The present report focused on the period from  
52 baseline to month 3 after the first dose.

### 53 **Neutralizing antibody measurement**

54 Neutralizing antibodies were measured using an FDA EUA approved assay, namely  
55 SARS-CoV-2 Surrogate Virus Neutralization Test (sVNT) (GenScript, USA) [4],  
56 following to the manufacturer's instructions (Supplementary Materials).

57 We also included neutralizing antibody data from 11 Vietnamese individuals with  
58 asymptomatic or mild SARS-CoV-2 infection for comparative analysis (Supplementary  
59 Materials) [5].

### 60 **Statistical analysis**

61 We used Fisher exact,  $\chi^2$  or Mann-Whitney U test to compare between groups (when  
62 appropriate). Logistic regression was used to assess association between the probability of  
63 having detectable neutralizing antibodies and age. Linear regression was used to assess the  
64 association between neutralizing antibodies levels and age. The analyses were carried  
65 using Prism 9.0.2 (graphpad.com).

### 66 **Ethics**

67 The study was approved by the Institutional Review Board of HTD and the Oxford  
68 Tropical Research Ethics Committee, University of Oxford, UK. Written informed  
69 consents were obtained all the participants.

## 70 **RESULTS**

### 71 **Demographics of the study participants**

72 A total 649/894 (73%) HTD staff consented to participate in the vaccine evaluation study.  
73 554/649 (85%) participants were successfully followed-up up to day 28 after the first dose  
74 and were thus included for analysis as whole group. The 554 study participants aged  
75 between 24 and 65 years (median: 37 years). Females were predominant (Supplementary  
76 Table 1)

77 Of the 144 participants of the subgroup, 104 (72%) and 95 (66%) were successfully  
78 followed-up up to 14 after the second dose and month 3 after the first dose, respectively.  
79 The age and gender distributions of these subgroups were comparable with that of the  
80 whole group (Supplementary Table 1). The window time between the first and the second  
81 dose was six weeks.

### 82 **Development of detectable neutralizing antibodies**

83 Because HTD members of staff were naïve to SARS-CoV-2 infection [1], we first focused  
84 our neutralizing antibody measurement on the baseline samples collected before the first  
85 dose of the subgroup. At baseline, none of the study participants had detectable  
86 neutralizing antibodies (Supplementary Table 2). At day 14 and 28 after the first dose, the  
87 proportions of the study participants with detectable neutralizing antibodies increased from  
88 27.3% (151/554) to 78.0% (432/554), respectively among all 554 individuals of the whole  
89 group. The proportion of the study participants with detectable neutralizing antibodies  
90 reached 98.1% (102/104) at 14 days after the second dose, and then slightly dropped to  
91 94.7% (90/95) at month 3 after the first dose (i.e. six weeks after the second dose)  
92 (Supplementary Table 2).

### 93 **Kinetics of neutralizing antibody levels**

94 Neutralizing antibody levels measured at day 28 after the first dose were significantly  
95 higher than that measured at day 14 (Figure 1A), but comparable with that measured at 6  
96 weeks (Figure 1B). At day 14 after the second dose, neutralizing antibodies significantly  
97 increased, and were comparable with that obtained from Vietnamese people with  
98 asymptomatic or mild infection (Figure 1B). At month 3 after the first dose neutralizing  
99 antibody levels were significantly lower than that measured at 14 days after the second  
100 dose (Figure 1B)

### 101 **Neutralizing antibodies vs. age and gender**

102 At day 14 after the first dose, the development and levels of detectable neutralizing  
103 antibodies among 554 study participants were negatively correlated with age. This  
104 difference was less profound at day 28, especially with regard to the development of  
105 detectable neutralizing antibodies (Figure 1C&D). At these corresponding time points,  
106 similar trends were also observed among individuals of the subgroup, but the difference  
107 was not significant (Supplementary Figure 1&2), likely because of the small sample size.  
108 At 14 days after the second dose and month 3 after the first dose, the proportion of  
109 individuals with detectable neutralizing antibodies was similar across age groups  
110 (Supplementary Figure 1B&C).

111 With the exception of day 28 after the first dose, neutralizing antibody levels and the  
112 proportion of study participants with detectable neutralizing antibodies were comparable  
113 between males and females (Supplementary Table 2 and Supplementary Figure 3).

### 114 **DISCUSSION**

115 We report the immunogenicity of Oxford-AstraZeneca COVID-19 vaccine in a cohort of  
116 554 Vietnamese healthcare workers who were naïve to SARS-CoV-2 infection. We  
117 showed that Oxford-AstraZeneca COVID-19 vaccine is immunogenic. At month 3 after  
118 the first dose, neutralizing antibody levels reduced significantly, while the seroconversion  
119 rate slightly declined from 98.1% at day 14 after the second dose to 94.7%.

120 Findings from the original phase 2/3 trial showed that spike protein specific IgG developed  
121 within two weeks after vaccination, and at 14 days after the second dose its titers increased  
122 with a seroconversion rate of 208/209 (>99%) [6]. Consistently, our study showed the  
123 development and the levels of neutralizing antibodies significantly increases after each  
124 dose, with the former reaching 98% at 14 days after the second dose. Parallel with these  
125 reports are real-world data from the UK showing that the administration of the second dose  
126 increased protection against SARS-CoV-2 infection from 65% by dose 1 to 70% by dose 2  
127 among vaccine recipients [7]. A single dose of Oxford-AstraZeneca or Pfizer COVID-19  
128 vaccines reduced COVID-19 hospital admissions among vaccine recipients by 88% and  
129 91%, respectively in Scotland [8].

130 Older individuals, especially those 80 years or above, without prior infection had lower  
131 levels of neutralizing antibodies induced by the first dose than younger adults [9, 10].  
132 These age-dependent responses were most profound within the first 3 weeks after  
133 vaccination, but were resolved by the administration of the second dose [9]. Although  
134 similar trends were observed in our study, at day 28 after the first dose, the differences in  
135 our study were negligible, especially in terms of the seroconversion rate. None of our study  
136 participant was older than 71 years, explaining why the observed differences were less  
137 profound as compared to the UK population based study.

138 The results provide reassuring evidence for the effectiveness of the proposed vaccination  
139 strategy aiming at prioritizing the first dose for as many people as possible in the first  
140 instance [11]. However, our results also emphasize the importance of the second dose,  
141 especially in older people, while it remains unknown whether the third dose is needed to  
142 provide long-term protection. A decline in antibody titers was recorded at week 8-12 after  
143 the first two doses among 75 study participants in the UK [12]. But the administration of  
144 the third dose helped boost the immune response. Antibody waning is presumably more  
145 profound among individuals without prior infection. Follow study is therefore critical to  
146 assess the levels of antibody waning among our study participants.

147 Our study has some limitations. We did not study cellular immunity, especially T cell  
148 response. And due to the age and gender structure in nature of HTD staff, we did not  
149 include participants older than 71 years and females were predominant among our study  
150 subjects. Compared with males, females seemed to better respond to Oxford-AstraZeneca  
151 COVID-19 vaccine at day 28 after the first dose, which warrants further research.

## 152 **CONCLUSIONS**

153 Oxford-AstraZeneca COVID-19 vaccine is immunogenic in Vietnamese healthcare  
154 workers who were naïve to SARS-CoV-2 infection. Neutralizing antibody levels decreased  
155 at month 3 after vaccination. The requirement for a third dose warrants further research.  
156 These data are critical to informing the deployment of COVID-19 vaccine in Vietnam and  
157 other Southeast Asian countries.



## 158 **ACKNOWLEDGEMENTS**

159 This study was funded by the Wellcome Trust of Great Britain (106680/B/14/Z and  
160 204904/Z/16/Z) and NIH/NIAID (HHSN272201400007C, Subcontract No. S000596-  
161 JHU)..

162 We thank our colleagues at the Hospital for Tropical Diseases in Ho Chi Minh City,  
163 Vietnam for their participations in this study.

### 164 **OUCRU COVID-19 Research Group**

165 **Hospital for Tropical Diseases, Ho Chi Minh City, Vietnam:** Nguyen Van Vinh Chau,  
166 Nguyen Thanh Dung, Le Manh Hung, Huynh Thi Loan, Nguyen Thanh Truong, Nguyen  
167 Thanh Phong, Dinh Nguyen Huy Man, Nguyen Van Hao, Duong Bich Thuy, Nghiem My  
168 Ngoc, Nguyen Phu Huong Lan, Pham Thi Ngoc Thoa, Tran Nguyen Phuong Thao, Tran  
169 Thi Lan Phuong, Le Thi Tam Uyen, Tran Thi Thanh Tam, Bui Thi Ton That, Huynh Kim  
170 Nhung, Ngo Tan Tai, Tran Nguyen Hoang Tu, Vo Trong Vuong, Dinh Thi Bich Ty, Le  
171 Thi Dung, Thai Lam Uyen, Nguyen Thi My Tien, Ho Thi Thu Thao, Nguyen Ngoc Thao,  
172 Huynh Ngoc Thien Vuong, Huynh Trung Trieu Pham Ngoc Phuong Thao, Phan Minh  
173 Phuong

174 **Oxford University Clinical Research Unit, Ho Chi Minh City, Vietnam:** Dong Thi  
175 Hoai Tam, Evelyne Kestelyn, Donovan Joseph, Ronald Geskus, Guy Thwaites, Ho Quang  
176 Chanh, H. Rogier van Doorn, Ho Van Hien, Ho Thi Bich Hai, Huynh Le Anh Huy, Huynh  
177 Ngan Ha, Huynh Xuan Yen, Jennifer Van Nuil, Jeremy Day, Joseph Donovan, Katrina  
178 Lawson, Lam Anh Nguyet, Lam Minh Yen, Le Dinh Van Khoa, Le Nguyen Truc Nhu, Le  
179 Thanh Hoang Nhat, Le Van Tan, Sonia Lewycka Odette, Louise Thwaites, Maia Rabaa,  
180 Marc Choisy, Mary Chambers, Motiur Rahman, Ngo Thi Hoa, Nguyen Thanh Thuy Nhien,  
181 Nguyen Thi Han Ny, Nguyen Thi Kim Tuyen, Nguyen Thi Phuong Dung, Nguyen Thi Thu  
182 Hong, Nguyen Xuan Truong, Phan Nguyen Quoc Khanh, Phung Le Kim Yen, Phung Tran  
183 Huy Nhat, Sophie Yacoub, Thomas Kesteman, Nguyen Thuy Thuong Thuong, Tran Tan  
184 Thanh, Tran Tinh Hien, Vu Thi Ty Hang

## REFERENCES

- 185 1. Chau, N.V.V., et al., *Absence of SARS-CoV-2 antibodies in health care workers of*  
186 *a tertiary referral hospital for COVID-19 in southern Vietnam*. *Journal of*  
187 *Infection*, 2021. **82**(1): p. e36-e37.
- 188 2. Van Tan, L., *COVID-19 control in Vietnam*. *Nat Immunol*, 2021. **22**(3): p. 261.
- 189 3. Chau, N.V.V., et al., *The natural history and transmission potential of*  
190 *asymptomatic SARS-CoV-2 infection*. *Clin Infect Dis*, 2020.
- 191 4. Tan, C.W., et al., *A SARS-CoV-2 surrogate virus neutralization test based on*  
192 *antibody-mediated blockage of ACE2-spike protein-protein interaction*. *Nat*  
193 *Biotechnol*, 2020. **38**(9): p. 1073-1078.
- 194 5. Mai, H.K., et al., *Long-Term Humoral Immune Response in Persons with*  
195 *Asymptomatic or Mild SARS-CoV-2 Infection, Vietnam*. *Emerg Infect Dis*, 2021.  
196 **27**(2): p. 663-666.
- 197 6. Folegatti, P.M., et al., *Safety and immunogenicity of the ChAdOx1 nCoV-19*  
198 *vaccine against SARS-CoV-2: a preliminary report of a phase 1/2, single-blind,*  
199 *randomised controlled trial*. *The Lancet*, 2020. **396**(10249): p. 467-478.
- 200 7. Pritchard, E., et al., *Impact of vaccination on SARS-CoV-2 cases in the community:*  
201 *a population-based study using the UK's COVID-19 Infection Survey*. *MedRxiv*,  
202 2021.
- 203 8. Vasileiou, E., et al., *Interim findings from first-dose mass COVID-19 vaccination*  
204 *roll-out and COVID-19 hospital admissions in Scotland: a national prospective*  
205 *cohort study*. *The Lancet*, 2021. **397**(10285): p. 1646-1657.
- 206 9. Wei, J., et al., *The impact of SARS-CoV-2 vaccines on antibody responses in the*  
207 *general population in the United Kingdom*. *MedRxiv*, 2021.
- 208 10. Abu Jabal, K., et al., *Impact of age, ethnicity, sex and prior infection status on*  
209 *immunogenicity following a single dose of the BNT162b2 mRNA COVID-19*  
210 *vaccine: real-world evidence from healthcare workers, Israel, December 2020 to*  
211 *January 2021*. *Euro Surveill*, 2021. **26**(6).
- 212 11. Romero-Brufau, S., et al., *Public health impact of delaying second dose of*  
213 *BNT162b2 or mRNA-1273 covid-19 vaccine: simulation agent based modeling*  
214 *study*. *BMJ*, 2021. **373**: p. n1087.
- 215 12. Flaxman, A., et al., *Tolerability and Immunogenicity After a Late Second Dose or a*  
216 *Third Dose of ChAdOx1 nCoV-19 (AZD1222)*. Preprint with *Lancet*,  
217 <http://dx.doi.org/10.2139/ssrn.3873839>.

218 **LEGENDS TO FIGURES**

219 **Figure 1:** Development of neutralizing antibodies levels and their associations with age;  
220 **A)** Neutralizing antibody levels measured at 14 and 28 days after the first dose of 554  
221 study participants; **B)** Neutralizing antibody levels measured at time points from baseline  
222 to month 3 after the first dose of the subgroups; **C)** Association between age and the  
223 probabilities of having detectable neutralizing antibodies at 14 and 28 days after the first  
224 dose of 554 study participants; **D)** Association between age and neutralizing antibody  
225 levels measured at 14 and 28 days after the first dose of 554 study participants

226 **Notes to figure 1B:** Data on neutralizing antibody levels obtained from 11 convalescent  
227 sera collected at week 4-7 (last column) from cases with mild or asymptomatic infection  
228 was included as references. Black circles: data for 2 week time point and grey circles: data  
229 for 4 week time point

Figure 1

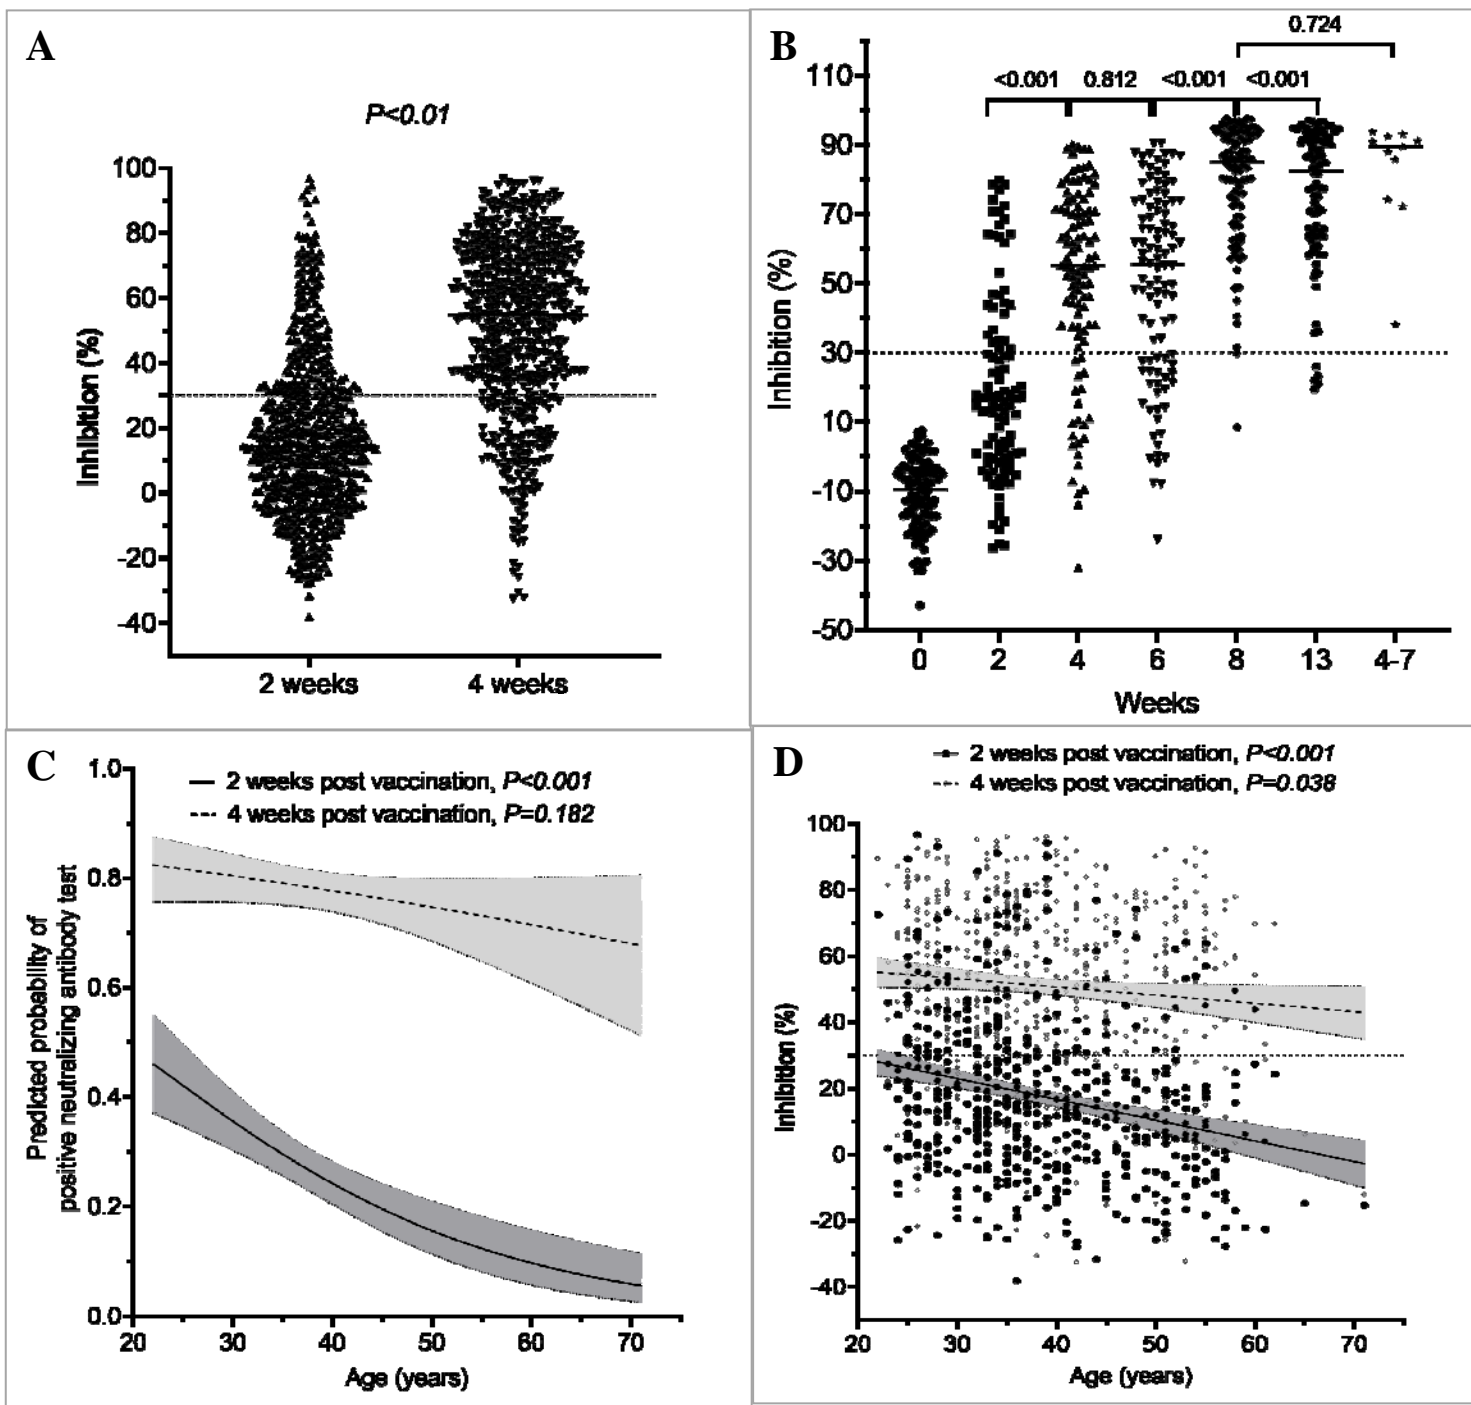

230 **Immunogenicity of Oxford-AstraZeneca COVID-19 vaccine in**  
231 **Vietnamese healthcare workers**

232 Nguyen Van Vinh Chau<sup>1</sup>, Lam Anh Nguyet<sup>2</sup>, Nguyen Thanh Truong<sup>1</sup>, Le Mau Toan<sup>1</sup>,  
233 Nguyen Thanh Dung<sup>1</sup>, Le Manh Hung<sup>1</sup>, Mai Thanh Nhan<sup>1</sup>, Dinh Nguyen Huy Man<sup>1</sup>,  
234 Nghiem My Ngoc<sup>1</sup>, Huynh Phuong Thao<sup>1</sup>, Tran Nguyen Hoang Tu<sup>1</sup>, Huynh Kim Mai<sup>3</sup>, Do  
235 Thai Hung<sup>3</sup>, Nguyen Thi Han Ny<sup>2</sup>, Le Kim Thanh<sup>2</sup>, Nguyen To Anh<sup>2</sup>, Nguyen Thi Thu  
236 Hong<sup>2</sup>, Le Nguyen Truc Nhu<sup>2</sup>, Lam Minh Yen<sup>2</sup>, Marc Choisy<sup>2,4</sup>, Tran Tan Thanh<sup>2</sup>, Guy  
237 Thwaites<sup>2,3</sup> and Le Van Tan<sup>2</sup>, for OUCRU COVID-19 Research Group\*

238 <sup>1</sup>Hospital for Tropical Diseases, Ho Chi Minh City, Vietnam

239 <sup>2</sup>Oxford University Clinical Research Unit, Ho Chi Minh City, Vietnam

240 <sup>3</sup>Institute of Pasteur, Nha Trang City, Vietnam

241 <sup>4</sup>Centre for Tropical Medicine and Global Health, Nuffield Department of Medicine,  
242 University of Oxford, Oxford, UK

\*Members of the groups are listed in the acknowledgments.

243 Correspondence: Nguyen Van Vinh Chau, [chaunvv@oucru.org](mailto:chaunvv@oucru.org), Le Van Tan,  
244 [tanlv@oucru.org](mailto:tanlv@oucru.org)

245 **COVID-19 vaccine rollout in Vietnam**

246 Vietnam received the first 117,000 doses of Oxford-AstraZeneca COVID-19 vaccine in  
247 early March 2021. High-risk groups, especially frontline healthcare workers, were  
248 prioritized for vaccination. The window time between two doses was set for 4 weeks, with  
249 some variation depending on the availability of the vaccine.

250 **List of groups prioritized for COVID-19 vaccination in Vietnam**

- 251 1. Frontline healthcare workers of COVID-19, including people whose work is to deal  
252 with COVID-19 prevention and control work (members of COVID-19 steering  
253 committees at all levels, staff at state-run quarantine sites, people conducting  
254 contract tracing and epidemiological investigations, volunteers, reporters among  
255 others), military and public security forces
- 256 2. Vietnamese diplomats, customs and immigration officers
- 257 3. Essential service workers in sectors such as aviation, transport, tourism, electricity  
258 and water supply
- 259 4. Teachers and individuals working at education and training facilities, and those  
260 working at State agencies with regular contact with various people
- 261 5. People with chronic diseases or aging above 65
- 262 6. Residents in outbreak hotspots in Vietnam
- 263 7. Poor people, Policy beneficiaries
- 264 8. Those who will be sent abroad for learning and working
- 265 9. Other people determined by the Ministry of Health

266 **Measurements of neutralizing antibody using Surrogate virus neutralization assay**

267 Surrogate virus neutralization assay (sVNT) is an assay that measures spike protein  
268 receptor binding domain (RBD)-targeting neutralizing antibodies (RBD-targeting NAbs)  
269 Prior to testing, plasma samples were first diluted 1:10 and then inactivated at 56<sup>0</sup>C for 30  
270 minutes. The experiments were carried out according the manufacturer's instruction. The  
271 obtained results were expressed as percentage of inhibition with the 30% cut-off applied.  
272 The percentage of inhibition measured by sVNT has been shown to well correlate with the  
273 neutralizing antibody tiers measured by the conventional plaque reduction neutralization  
274 assay [1].

#### 275 **Neutralizing antibody data from cases of natural infection**

276 To compare the development of neutralizing antibodies induced by vaccination against that  
277 of natural infection, we included data from 11 Vietnamese patients who had mild or  
278 asymptomatic infections. Details about these individuals and neutralizing antibody  
279 measurement were detailed in our recent report [2].

#### 280 **References**

- 281 1. Tan, C.W., et al., *A SARS-CoV-2 surrogate virus neutralization test based on*  
282 *antibody-mediated blockage of ACE2-spike protein-protein interaction*. Nat  
283 Biotechnol, 2020. **38**(9): p. 1073-1078.
- 284 2. Mai, H.K., et al., *Long-Term Humoral Immune Response in Persons with*  
285 *Asymptomatic or Mild SARS-CoV-2 Infection, Vietnam*. Emerg Infect Dis, 2021.  
286 **27**(2): p. 663-666.

**Supplementary Table 1: Demographics of the study participants**

|                             | <b>Whole group<br/>(N=554)</b> | <b>Subgroup (N=104)</b> | <b>Subgroup (N=95)</b> |
|-----------------------------|--------------------------------|-------------------------|------------------------|
| Male, n (%)                 | 136 (25)                       | 25 (24)                 | 21 (22)                |
| Female, n (%)               | 418 (75)                       | 79 (76)                 | 73 (78)                |
| Median age in years (range) | 36 (22 – 71)                   | 37 (24 – 65)            | 37 (24-65)             |
| Age groups                  |                                |                         |                        |
| 20-39, n (%)                | 332 (60)                       | 57 (55)                 | 50 (53)                |
| 40-60, n (%)                | 217 (39)                       | 46 (44)                 | 43 (46)                |
| 61-71, n (%)                | 5 (1)                          | 1 (1)                   | 1 (1)                  |



**Supplementary Table 2:** The proportion of study participants with detectable neutralizing antibodies after vaccination

| Time point                     | Whole group      |                 |                   |          | Subgroup         |                |                  |          |
|--------------------------------|------------------|-----------------|-------------------|----------|------------------|----------------|------------------|----------|
|                                | Total<br>(N=554) | Male<br>(N=136) | Female<br>(N=418) | P value* | Total<br>(N=104) | Male<br>(N=25) | Female<br>(N=79) | P value* |
| Baseline, n (%)                | 0                | 0               | 0                 | NA       | 0                | 0              | 0                | NA       |
| 14 days after dose 1, n (%)    | 151 (27.3)       | 40 (29.4)       | 111 (26.6)        | 0.52     | 31 (29.8)        | 10 (40.0)      | 21 (26.6)        | 0.20     |
| 28 days after dose 1, n (%)    | 432 (78.0)       | 97 (71.3)       | 335 (80.1)        | 0.031    | 82 (78.8)        | 20 (80.0)      | 62 (78.5)        | 0.87     |
| Before dose 2, n (%)           | N/A              | N/A             | N/A               | N/A      | 73 (70.2)        | 17 (68.0)      | 56 (70.1)        | 0.78     |
| 14 days after dose 2, n (%)    | N/A              | N/A             | N/A               | N/A      | 102 (98.1)       | 24 (96.0)      | 78 (98.7)        | 0.43     |
| Month 3 after the first dose** | NA               | NA              | NA                | NA       | 89 (94.7)        | 68 (95.5)      | 21 (95.5)        | 1        |

**Notes to Supplementary Table 2:** \*for comparison between males and females, NA: non-applicable, \*\* n=95 (male: 22 and females: 72)

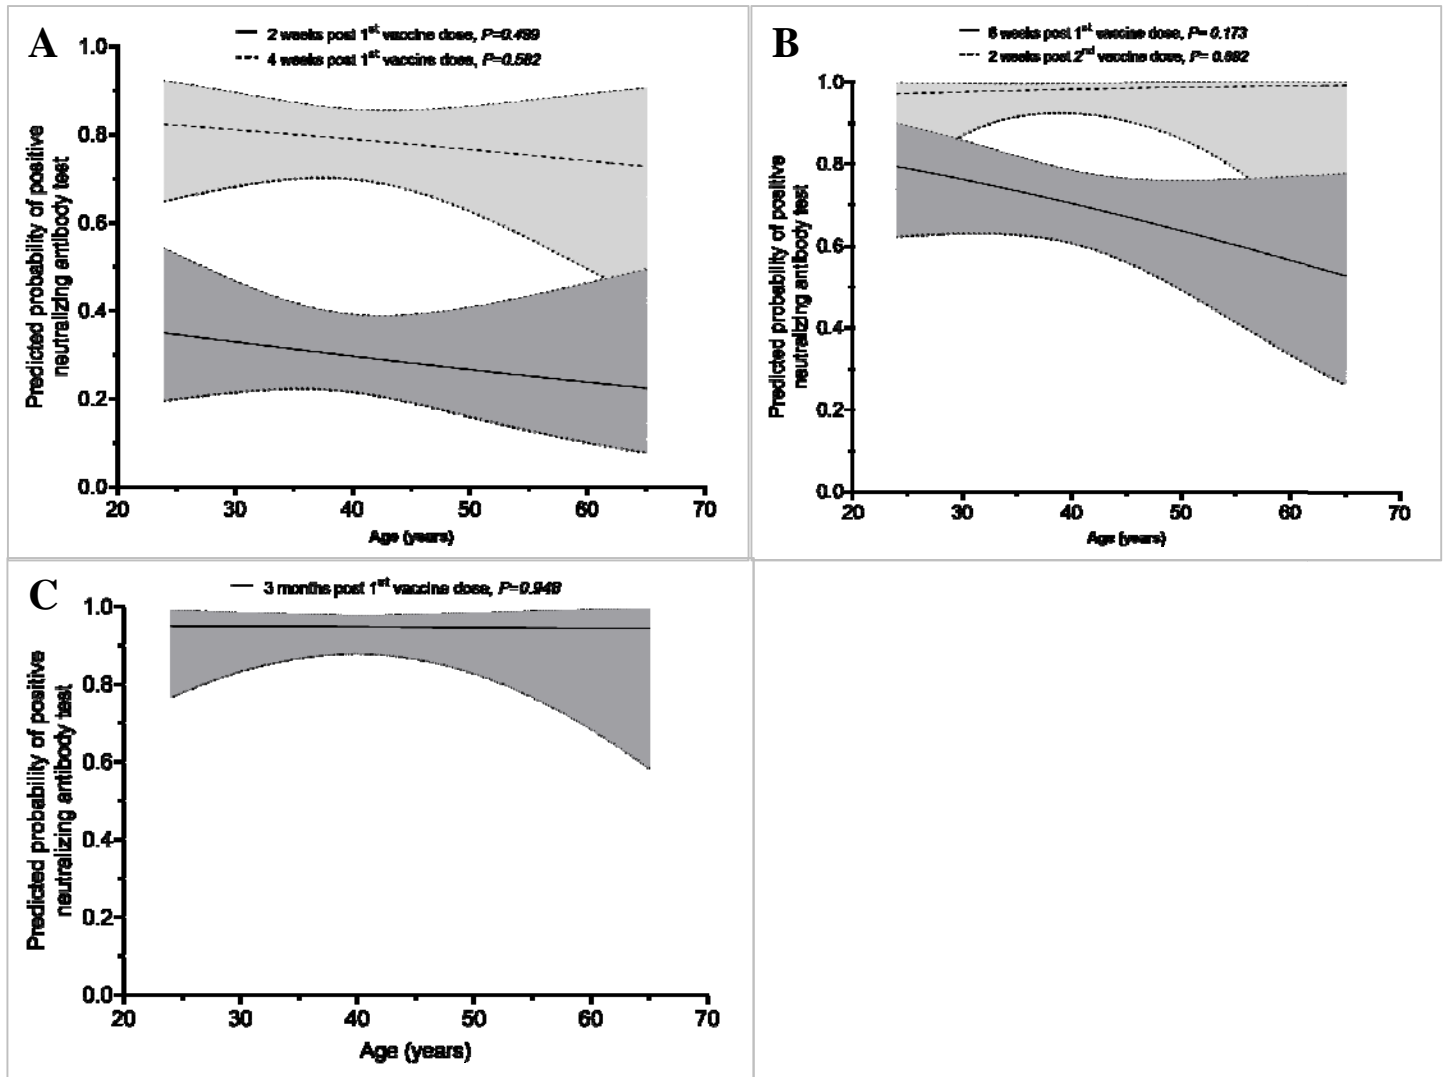

**Supplementary Figure 1:** Probability of having detectable neutralizing antibodies among the study participants selected for assessment of the impact of the second dose. **A)** At 2 and 4 weeks after the first dose ( $n=104$ ), **B)** Before the second dose (i.e. 6 weeks after the first dose) and 2 weeks after the second dose ( $n=104$ ) and **C)** at month 3 after the first dose ( $n=95$ )

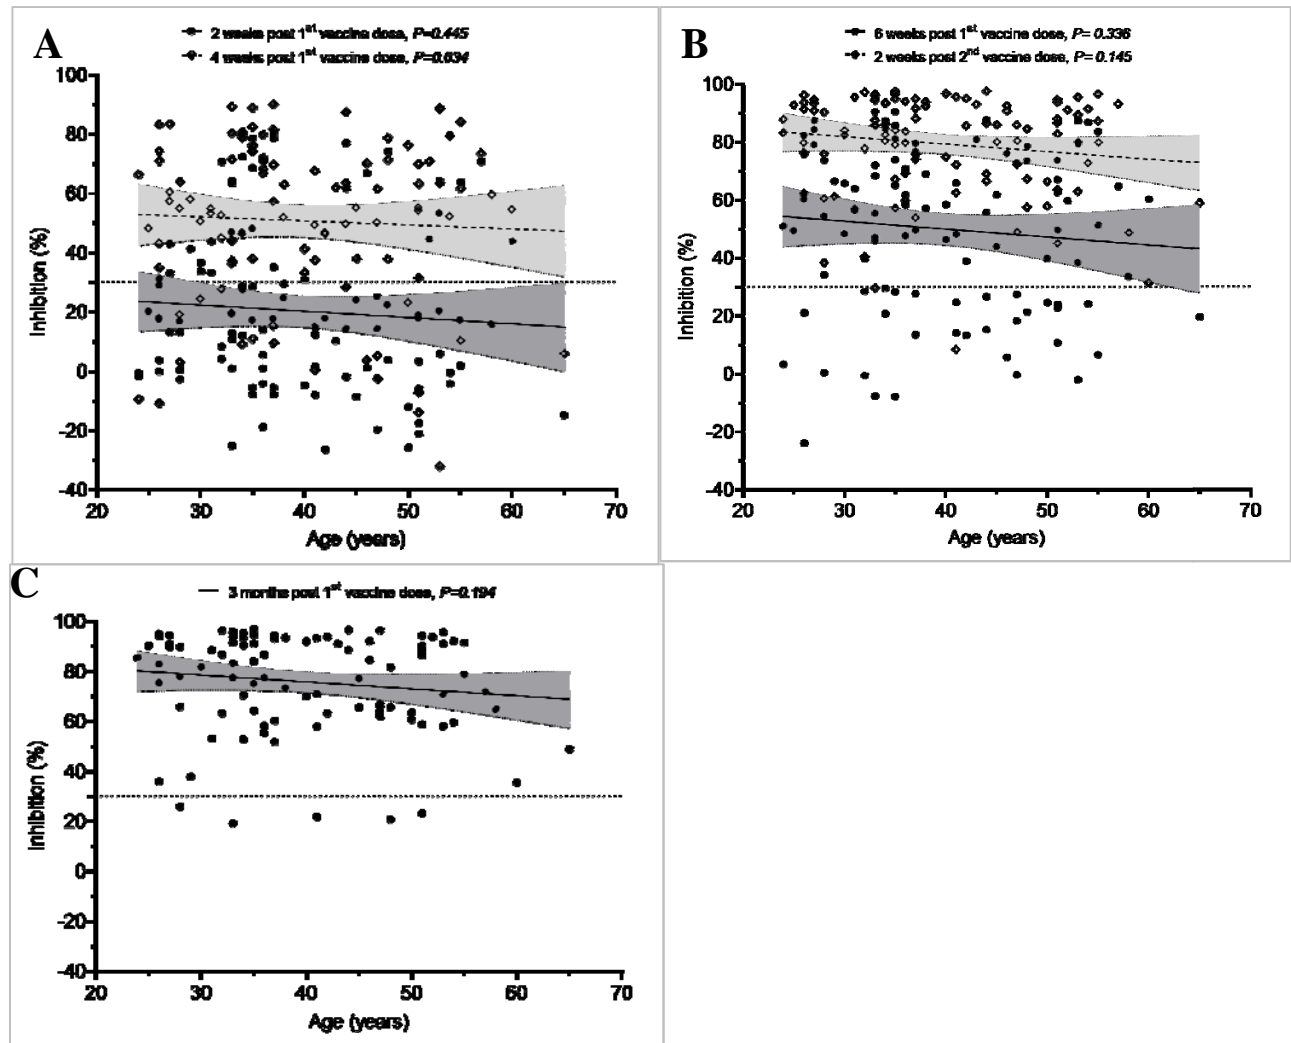

**Supplementary Figure 2:** Neutralizing antibody levels of participants selected for assessment of the impact of the second dose. **A)** At 2 and 4 weeks after the first dose (n=104), **B)** Before the second dose (i.e. 6 weeks after the first dose) and 2 weeks after the second dose (n=104) and **C)** at month 3 after the first dose (n=95)

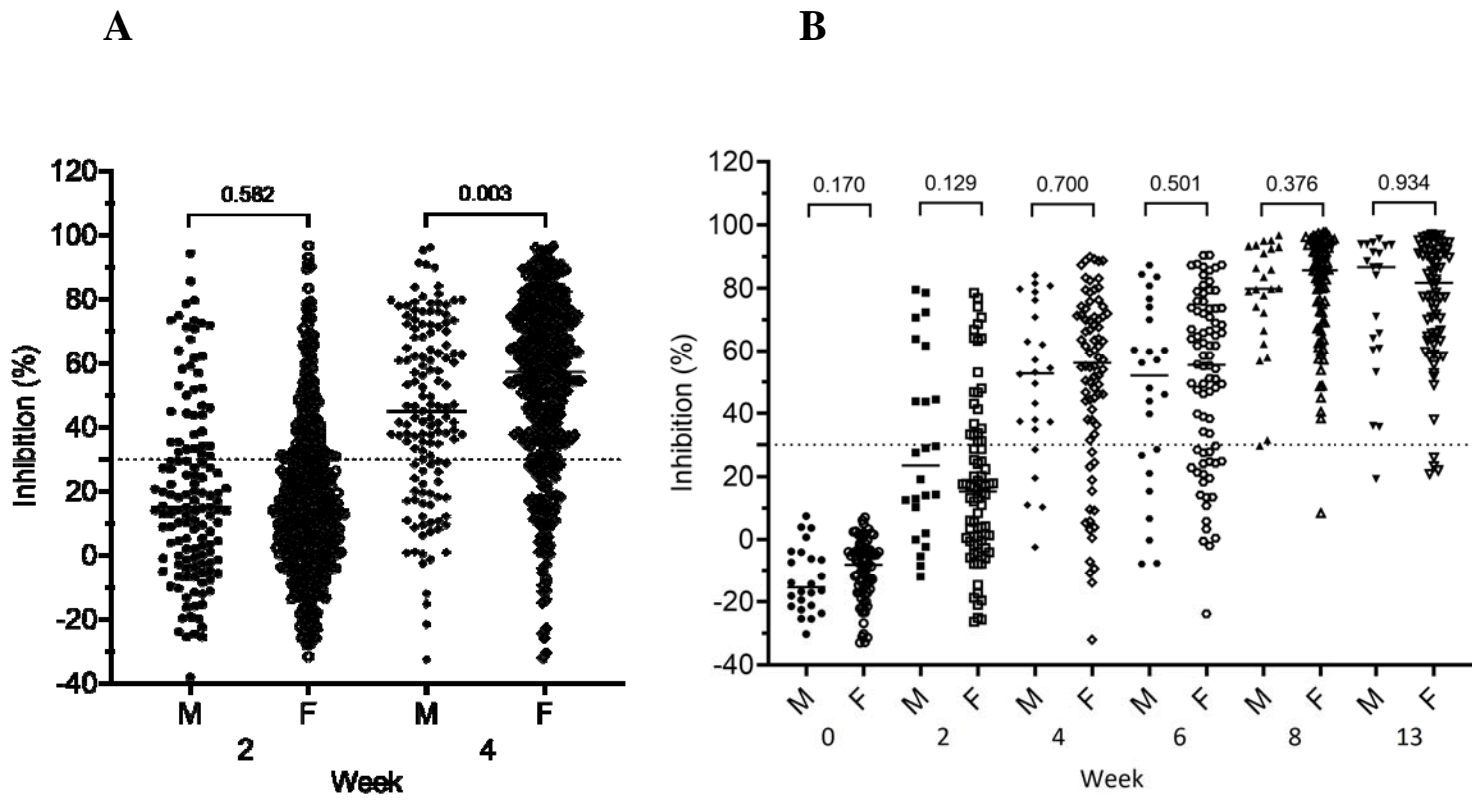

**Supplementary Figure 3:** Association between neutralizing antibody levels and gender. **A)** At 2 and 4 weeks after the first dose of the whole group (n=554), **B)** From baseline to month three after the first dose of the subgroup
